# Supplementary material for: Accelerometer-Measured Physical Activity Levels and Patterns Vary in an Age- and Sex-Dependent Fashion among Finnish Children and Adolescents
Source: MDPI journal article supplement (doi:10.3390/ijerph19116950), 2022-06-06
Supplement: s1 [file s1]

Table S2. Participants' hourly LPA minutes by sex and tertiles and p-values for tertile differences

|                                                | time of the day | BOYS          |        |             |                                   | GIRLS         |        |             |                                   |
|------------------------------------------------|-----------------|---------------|--------|-------------|-----------------------------------|---------------|--------|-------------|-----------------------------------|
|                                                |                 | step tertiles |        |             | p-value<br>(Kruskall-Wallis test) | step tertiles |        |             | p-value<br>(Kruskall-Wallis test) |
|                                                |                 | least active  | middle | most active |                                   | least active  | middle | most active |                                   |
| LPA minutes<br>(hourly average)                | 7               | 5,0           | 6,9    | 8,7         | <b>0,272</b>                      | 5,9           | 8,8    | 8,9         | <b>0,128</b>                      |
|                                                | 8               | 12,1          | 13,7   | 13,0        | <b>0,665</b>                      | 13,6          | 12,9   | 13,9        | <b>0,468</b>                      |
|                                                | 9               | 11,4          | 11,1   | 12,0        | <b>0,112</b>                      | 10,7          | 11,3   | 10,9        | <b>0,071</b>                      |
|                                                | 10              | 9,7           | 9,6    | 9,6         | <b>0,822</b>                      | 8,0           | 8,9    | 9,0         | <b>0,000</b>                      |
|                                                | 11              | 9,0           | 9,5    | 9,5         | <b>0,057</b>                      | 7,8           | 8,4    | 8,8         | <b>0,000</b>                      |
|                                                | 12              | 9,2           | 9,5    | 9,9         | <b>0,027</b>                      | 8,1           | 8,9    | 9,2         | <b>0,000</b>                      |
|                                                | 13              | 9,3           | 9,9    | 9,8         | <b>0,008</b>                      | 8,4           | 8,9    | 9,1         | <b>0,002</b>                      |
|                                                | 14              | 9,7           | 10,2   | 10,4        | <b>0,018</b>                      | 9,0           | 9,7    | 9,6         | <b>0,001</b>                      |
|                                                | 15              | 9,4           | 10,1   | 10,3        | <b>0,000</b>                      | 9,4           | 10,1   | 10,3        | <b>0,000</b>                      |
|                                                | 16              | 8,4           | 9,7    | 10,0        | <b>0,000</b>                      | 9,2           | 10,2   | 10,7        | <b>0,000</b>                      |
|                                                | 17              | 8,4           | 9,7    | 10,3        | <b>0,000</b>                      | 9,0           | 10,2   | 10,9        | <b>0,000</b>                      |
|                                                | 18              | 8,9           | 10,1   | 10,5        | <b>0,000</b>                      | 9,1           | 10,5   | 11,1        | <b>0,000</b>                      |
|                                                | 19              | 8,4           | 10,0   | 10,4        | <b>0,000</b>                      | 9,0           | 10,2   | 10,9        | <b>0,000</b>                      |
|                                                | 20              | 8,0           | 9,2    | 9,9         | <b>0,000</b>                      | 8,5           | 9,6    | 10,3        | <b>0,000</b>                      |
|                                                | 21              | 6,9           | 8,0    | 8,3         | <b>0,000</b>                      | 7,4           | 8,1    | 8,9         | <b>0,000</b>                      |
| LPA minutes on<br>weekdays (hourly<br>average) | 22              | 5,8           | 6,6    | 7,0         | <b>0,000</b>                      | 6,5           | 7,4    | 7,5         | <b>0,000</b>                      |
|                                                | 23              | 4,5           | 5,6    | 5,9         | <b>0,000</b>                      | 5,7           | 6,4    | 6,5         | <b>0,000</b>                      |
|                                                | 7               | 5,9           | 7,7    | 9,9         | <b>0,355</b>                      | 6,2           | 9,8    | 10,7        | <b>0,006</b>                      |
|                                                | 8               | 12,8          | 14,3   | 13,4        | <b>0,903</b>                      | 14,1          | 13,6   | 14,5        | <b>0,668</b>                      |
|                                                | 9               | 11,8          | 11,5   | 12,1        | <b>0,581</b>                      | 10,9          | 11,5   | 11,1        | <b>0,072</b>                      |
|                                                | 10              | 9,9           | 9,6    | 9,5         | <b>0,610</b>                      | 8,0           | 8,9    | 8,8         | <b>0,000</b>                      |
|                                                | 11              | 8,9           | 9,5    | 9,2         | <b>0,147</b>                      | 7,6           | 8,1    | 8,2         | <b>0,002</b>                      |
|                                                | 12              | 9,3           | 9,3    | 9,6         | <b>0,225</b>                      | 7,7           | 8,5    | 8,7         | <b>0,000</b>                      |
|                                                | 13              | 9,5           | 9,9    | 9,8         | <b>0,154</b>                      | 8,1           | 8,4    | 8,6         | <b>0,091</b>                      |
|                                                | 14              | 10,1          | 10,2   | 10,3        | <b>0,683</b>                      | 8,8           | 9,5    | 9,2         | <b>0,008</b>                      |
|                                                | 15              | 9,6           | 10,0   | 10,3        | <b>0,013</b>                      | 9,4           | 10,0   | 10,1        | <b>0,000</b>                      |
|                                                | 16              | 8,5           | 9,4    | 9,8         | <b>0,000</b>                      | 9,2           | 10,1   | 10,7        | <b>0,000</b>                      |
|                                                | 17              | 8,4           | 9,5    | 10,3        | <b>0,000</b>                      | 8,9           | 10,2   | 11,0        | <b>0,000</b>                      |
|                                                | 18              | 8,9           | 10,1   | 10,7        | <b>0,000</b>                      | 9,2           | 10,7   | 11,3        | <b>0,000</b>                      |
|                                                | 19              | 8,5           | 10,3   | 10,5        | <b>0,000</b>                      | 9,0           | 10,4   | 11,1        | <b>0,000</b>                      |
| LPA minutes on<br>weekends (hourly<br>average) | 20              | 8,1           | 9,4    | 10,0        | <b>0,000</b>                      | 8,7           | 9,8    | 10,6        | <b>0,000</b>                      |
|                                                | 21              | 7,0           | 7,9    | 8,6         | <b>0,000</b>                      | 7,4           | 8,2    | 9,2         | <b>0,000</b>                      |
|                                                | 22              | 5,8           | 6,7    | 7,0         | <b>0,000</b>                      | 6,3           | 7,4    | 7,7         | <b>0,000</b>                      |
|                                                | 23              | 4,6           | 5,6    | 5,5         | <b>0,042</b>                      | 5,9           | 6,5    | 6,7         | <b>0,000</b>                      |
|                                                | 7               | 2,0           | 2,7    | 2,1         | <b>0,772</b>                      | 2,0           | 3,7    | 2,9         | <b>0,211</b>                      |
|                                                | 8               | 4,2           | 6,5    | 8,5         | <b>0,007</b>                      | 3,1           | 4,8    | 7,2         | <b>0,002</b>                      |
|                                                | 9               | 6,8           | 7,2    | 10,5        | <b>0,000</b>                      | 6,7           | 7,9    | 9,2         | <b>0,000</b>                      |
|                                                | 10              | 8,1           | 10,0   | 11,0        | <b>0,000</b>                      | 8,7           | 9,3    | 11,0        | <b>0,000</b>                      |
|                                                | 11              | 9,5           | 9,6    | 11,1        | <b>0,000</b>                      | 10,0          | 10,2   | 12,0        | <b>0,000</b>                      |

|    |     |      |      |              |     |      |      |              |
|----|-----|------|------|--------------|-----|------|------|--------------|
| 12 | 9,0 | 10,4 | 11,2 | <b>0,000</b> | 9,9 | 10,9 | 11,4 | <b>0,000</b> |
| 13 | 8,7 | 10,0 | 10,1 | <b>0,000</b> | 9,7 | 11,0 | 11,0 | <b>0,000</b> |
| 14 | 8,6 | 10,0 | 10,6 | <b>0,000</b> | 9,9 | 10,2 | 11,1 | <b>0,001</b> |
| 15 | 8,9 | 10,4 | 10,6 | <b>0,000</b> | 9,7 | 10,6 | 10,9 | <b>0,000</b> |
| 16 | 8,3 | 10,7 | 10,6 | <b>0,000</b> | 9,5 | 10,5 | 10,8 | <b>0,000</b> |
| 17 | 8,7 | 10,5 | 10,5 | <b>0,000</b> | 9,6 | 10,4 | 10,6 | <b>0,001</b> |
| 18 | 8,6 | 10,0 | 10,0 | <b>0,000</b> | 8,8 | 9,9  | 10,4 | <b>0,000</b> |
| 19 | 8,1 | 9,0  | 9,8  | <b>0,000</b> | 8,7 | 9,5  | 10,1 | <b>0,000</b> |
| 20 | 7,7 | 8,5  | 9,2  | <b>0,000</b> | 7,7 | 8,8  | 9,4  | <b>0,000</b> |
| 21 | 6,8 | 8,1  | 7,5  | <b>0,001</b> | 7,3 | 7,7  | 8,2  | <b>0,010</b> |
| 22 | 5,9 | 6,6  | 6,7  | <b>0,066</b> | 6,5 | 7,6  | 7,2  | <b>0,004</b> |
| 23 | 4,4 | 6,0  | 5,7  | <b>0,001</b> | 5,2 | 7,1  | 6,5  | <b>0,000</b> |
