# Supplementary material for: Accelerometer-Measured Physical Activity Levels and Patterns Vary in an Age- and Sex-Dependent Fashion among Finnish Children and Adolescents
Source: MDPI journal article supplement (doi:10.3390/ijerph19116950), 2022-06-06
Supplement: s1 [file s1]

Table S3. Participants' hourly MET values by sex and tertiles and p-values for tertile differences

|                                                   | time of the day | BOYS          |        |             |                                   | GIRLS         |        |             |                                   |
|---------------------------------------------------|-----------------|---------------|--------|-------------|-----------------------------------|---------------|--------|-------------|-----------------------------------|
|                                                   |                 | step tertiles |        |             | p-value<br>(Kruskall-Wallis test) | step tertiles |        |             | p-value<br>(Kruskall-Wallis test) |
|                                                   |                 | least active  | middle | most active |                                   | least active  | middle | most active |                                   |
| Maximum 1 minute MET (hourly average)             | 7               | 2,36          | 2,84   | 2,76        | 0,618                             | 2,60          | 2,70   | 2,77        | 0,971                             |
|                                                   | 8               | 4,19          | 4,31   | 4,76        | 0,006                             | 4,10          | 4,32   | 4,44        | 0,020                             |
|                                                   | 9               | 4,93          | 5,19   | 5,67        | 0,000                             | 4,74          | 5,03   | 5,16        | 0,000                             |
|                                                   | 10              | 5,18          | 5,64   | 6,12        | 0,000                             | 4,68          | 5,02   | 5,26        | 0,000                             |
|                                                   | 11              | 5,18          | 5,85   | 6,30        | 0,000                             | 4,81          | 5,10   | 5,44        | 0,000                             |
|                                                   | 12              | 5,44          | 6,18   | 6,74        | 0,000                             | 4,94          | 5,32   | 5,73        | 0,000                             |
|                                                   | 13              | 5,24          | 6,00   | 6,46        | 0,000                             | 4,83          | 5,16   | 5,65        | 0,000                             |
|                                                   | 14              | 5,00          | 5,67   | 6,18        | 0,000                             | 4,60          | 5,11   | 5,52        | 0,000                             |
|                                                   | 15              | 4,68          | 5,35   | 6,08        | 0,000                             | 4,54          | 5,06   | 5,59        | 0,000                             |
|                                                   | 16              | 4,18          | 5,13   | 5,79        | 0,000                             | 4,29          | 4,79   | 5,42        | 0,000                             |
|                                                   | 17              | 4,25          | 5,19   | 6,18        | 0,000                             | 4,12          | 4,85   | 5,62        | 0,000                             |
|                                                   | 18              | 4,46          | 5,60   | 6,65        | 0,000                             | 4,30          | 5,07   | 6,02        | 0,000                             |
|                                                   | 19              | 4,49          | 5,85   | 6,74        | 0,000                             | 4,34          | 5,17   | 6,22        | 0,000                             |
|                                                   | 20              | 4,35          | 5,61   | 6,51        | 0,000                             | 4,35          | 5,18   | 5,94        | 0,000                             |
|                                                   | 21              | 3,95          | 4,69   | 5,66        | 0,000                             | 3,89          | 4,45   | 5,11        | 0,000                             |
|                                                   | 22              | 3,45          | 3,98   | 4,62        | 0,000                             | 3,51          | 3,97   | 4,42        | 0,000                             |
|                                                   | 23              | 2,94          | 3,40   | 3,71        | 0,000                             | 3,22          | 3,44   | 3,75        | 0,000                             |
| Maximum 1 minute MET on weekdays (hourly average) | 7               | 2,49          | 3,04   | 2,83        | 0,977                             | 2,69          | 2,92   | 3,02        | 0,593                             |
|                                                   | 8               | 4,31          | 4,48   | 4,77        | 0,019                             | 4,18          | 4,45   | 4,58        | 0,008                             |
|                                                   | 9               | 5,04          | 5,39   | 5,70        | 0,000                             | 4,82          | 5,10   | 5,26        | 0,000                             |
|                                                   | 10              | 5,39          | 5,82   | 6,20        | 0,000                             | 4,81          | 5,14   | 5,30        | 0,000                             |
|                                                   | 11              | 5,43          | 6,12   | 6,37        | 0,000                             | 4,95          | 5,22   | 5,46        | 0,000                             |
|                                                   | 12              | 5,75          | 6,49   | 6,92        | 0,000                             | 5,12          | 5,49   | 5,76        | 0,000                             |
|                                                   | 13              | 5,55          | 6,25   | 6,59        | 0,000                             | 5,02          | 5,33   | 5,64        | 0,000                             |
|                                                   | 14              | 5,28          | 5,90   | 6,26        | 0,000                             | 4,78          | 5,30   | 5,54        | 0,000                             |
|                                                   | 15              | 4,87          | 5,43   | 6,03        | 0,000                             | 4,66          | 5,17   | 5,62        | 0,000                             |
|                                                   | 16              | 4,24          | 5,10   | 5,69        | 0,000                             | 4,33          | 4,81   | 5,39        | 0,000                             |
|                                                   | 17              | 4,29          | 5,25   | 6,20        | 0,000                             | 4,14          | 4,91   | 5,67        | 0,000                             |
|                                                   | 18              | 4,50          | 5,76   | 6,80        | 0,000                             | 4,39          | 5,23   | 6,18        | 0,000                             |
|                                                   | 19              | 4,55          | 6,03   | 6,94        | 0,000                             | 4,45          | 5,30   | 6,43        | 0,000                             |
|                                                   | 20              | 4,43          | 5,83   | 6,70        | 0,000                             | 4,45          | 5,33   | 6,12        | 0,000                             |
|                                                   | 21              | 4,01          | 4,81   | 5,83        | 0,000                             | 3,89          | 4,53   | 5,27        | 0,000                             |
|                                                   | 22              | 3,51          | 4,10   | 4,78        | 0,000                             | 3,52          | 4,00   | 4,49        | 0,000                             |
|                                                   | 23              | 3,01          | 3,47   | 3,72        | 0,000                             | 3,31          | 3,57   | 3,94        | 0,000                             |
| Maximum 1 minute MET on weekends                  | 7               | 1,93          | 2,13   | 2,20        | 0,542                             | 1,79          | 1,92   | 2,18        | 0,766                             |
|                                                   | 8               | 2,69          | 2,85   | 4,40        | 0,003                             | 2,31          | 2,81   | 3,13        | 0,013                             |
|                                                   | 9               | 3,47          | 3,69   | 5,06        | 0,000                             | 3,27          | 3,84   | 4,12        | 0,000                             |
|                                                   | 10              | 3,70          | 4,44   | 5,95        | 0,000                             | 3,58          | 4,22   | 5,12        | 0,000                             |

|                     |    |      |      |      |       |      |      |      |       |
|---------------------|----|------|------|------|-------|------|------|------|-------|
| (hourly<br>average) | 11 | 4,00 | 4,66 | 6,25 | 0,000 | 4,03 | 4,57 | 5,39 | 0,000 |
|                     | 12 | 4,31 | 5,00 | 6,19 | 0,000 | 4,15 | 4,70 | 5,54 | 0,000 |
|                     | 13 | 4,16 | 5,15 | 6,01 | 0,000 | 4,07 | 4,57 | 5,64 | 0,000 |
|                     | 14 | 4,09 | 4,96 | 5,89 | 0,000 | 3,98 | 4,48 | 5,39 | 0,000 |
|                     | 15 | 4,12 | 5,14 | 6,19 | 0,000 | 4,13 | 4,70 | 5,45 | 0,000 |
|                     | 16 | 4,04 | 5,22 | 6,14 | 0,000 | 4,15 | 4,69 | 5,57 | 0,000 |
|                     | 17 | 4,16 | 5,06 | 6,18 | 0,000 | 4,13 | 4,66 | 5,48 | 0,000 |
|                     | 18 | 4,33 | 5,12 | 6,15 | 0,000 | 4,00 | 4,57 | 5,37 | 0,000 |
|                     | 19 | 4,27 | 5,27 | 6,07 | 0,000 | 4,04 | 4,66 | 5,52 | 0,000 |
|                     | 20 | 4,15 | 4,86 | 5,74 | 0,000 | 3,95 | 4,55 | 5,38 | 0,000 |
|                     | 21 | 3,78 | 4,36 | 5,22 | 0,000 | 3,90 | 4,17 | 4,55 | 0,001 |
|                     | 22 | 3,42 | 3,73 | 4,12 | 0,004 | 3,39 | 3,95 | 4,33 | 0,000 |
|                     | 23 | 2,85 | 3,43 | 3,54 | 0,000 | 3,04 | 3,39 | 3,54 | 0,000 |
