# Supplementary material for: Accelerometer-Measured Physical Activity Levels and Patterns Vary in an Age- and Sex-Dependent Fashion among Finnish Children and Adolescents
Source: MDPI journal article supplement (doi:10.3390/ijerph19116950), 2022-06-06
Supplement: s1 [file s1]

Table S1. Participants' hourly step counts by sex and tertiles and p-values for tertile differences.

|                                               | time of the day | BOYS          |        |             |                                   | GIRLS         |        |             |                                   |
|-----------------------------------------------|-----------------|---------------|--------|-------------|-----------------------------------|---------------|--------|-------------|-----------------------------------|
|                                               |                 | step tertiles |        |             | p-value<br>(Kruskall-Wallis test) | step tertiles |        |             | p-value<br>(Kruskall-Wallis test) |
|                                               |                 | least active  | middle | most active |                                   | least active  | middle | most active |                                   |
| step count<br>(hourly avarage)                | 7               | 541           | 571    | 673         | <b>0.034</b>                      | 454           | 591    | 634         | <b>0.004</b>                      |
|                                               | 8               | 619           | 722    | 928         | <b>&lt;0.001</b>                  | 559           | 712    | 786         | <b>&lt;0.001</b>                  |
|                                               | 9               | 624           | 774    | 972         | <b>&lt;0.001</b>                  | 512           | 618    | 713         | <b>&lt;0.001</b>                  |
|                                               | 10              | 607           | 800    | 974         | <b>&lt;0.001</b>                  | 513           | 612    | 728         | <b>&lt;0.001</b>                  |
|                                               | 11              | 671           | 903    | 1111        | <b>&lt;0.001</b>                  | 561           | 663    | 836         | <b>&lt;0.001</b>                  |
|                                               | 12              | 671           | 888    | 1105        | <b>&lt;0.001</b>                  | 554           | 656    | 838         | <b>&lt;0.001</b>                  |
|                                               | 13              | 672           | 863    | 1079        | <b>&lt;0.001</b>                  | 563           | 722    | 905         | <b>&lt;0.001</b>                  |
|                                               | 14              | 633           | 852    | 1134        | <b>&lt;0.001</b>                  | 576           | 759    | 975         | <b>&lt;0.001</b>                  |
|                                               | 15              | 476           | 756    | 1077        | <b>&lt;0.001</b>                  | 481           | 649    | 889         | <b>&lt;0.001</b>                  |
|                                               | 16              | 498           | 783    | 1183        | <b>&lt;0.001</b>                  | 441           | 660    | 933         | <b>&lt;0.001</b>                  |
|                                               | 17              | 565           | 918    | 1426        | <b>&lt;0.001</b>                  | 479           | 721    | 1131        | <b>&lt;0.001</b>                  |
|                                               | 18              | 582           | 1045   | 1537        | <b>&lt;0.001</b>                  | 511           | 764    | 1237        | <b>&lt;0.001</b>                  |
|                                               | 19              | 501           | 921    | 1356        | <b>&lt;0.001</b>                  | 482           | 742    | 1065        | <b>&lt;0.001</b>                  |
|                                               | 20              | 339           | 560    | 922         | <b>&lt;0.001</b>                  | 342           | 479    | 721         | <b>&lt;0.001</b>                  |
|                                               | 21              | 216           | 338    | 533         | <b>&lt;0.001</b>                  | 228           | 349    | 477         | <b>&lt;0.001</b>                  |
|                                               | 22              | 165           | 227    | 325         | <b>&lt;0.001</b>                  | 198           | 249    | 328         | <b>&lt;0.001</b>                  |
|                                               | 23              | 131           | 216    | 284         | <b>0.015</b>                      | 114           | 247    | 246         | <b>&lt;0.001</b>                  |
| step count on<br>weekdays<br>(hourly avarage) | 7               | 574           | 614    | 686         | <b>0.090</b>                      | 477           | 609    | 666         | <b>0.002</b>                      |
|                                               | 8               | 652           | 768    | 930         | <b>&lt;0.001</b>                  | 575           | 719    | 808         | <b>&lt;0.001</b>                  |
|                                               | 9               | 664           | 805    | 967         | <b>&lt;0.001</b>                  | 531           | 641    | 701         | <b>&lt;0.001</b>                  |
|                                               | 10              | 642           | 832    | 927         | <b>&lt;0.001</b>                  | 530           | 610    | 686         | <b>&lt;0.001</b>                  |
|                                               | 11              | 713           | 931    | 1085        | <b>&lt;0.001</b>                  | 574           | 681    | 777         | <b>&lt;0.001</b>                  |
|                                               | 12              | 720           | 913    | 1094        | <b>&lt;0.001</b>                  | 583           | 673    | 786         | <b>&lt;0.001</b>                  |
|                                               | 13              | 723           | 911    | 1050        | <b>&lt;0.001</b>                  | 593           | 756    | 884         | <b>&lt;0.001</b>                  |
|                                               | 14              | 669           | 863    | 1094        | <b>&lt;0.001</b>                  | 616           | 800    | 974         | <b>&lt;0.001</b>                  |
|                                               | 15              | 485           | 724    | 1045        | <b>&lt;0.001</b>                  | 495           | 654    | 873         | <b>&lt;0.001</b>                  |
|                                               | 16              | 508           | 782    | 1190        | <b>&lt;0.001</b>                  | 446           | 672    | 950         | <b>&lt;0.001</b>                  |
|                                               | 17              | 596           | 980    | 1502        | <b>&lt;0.001</b>                  | 495           | 762    | 1195        | <b>&lt;0.001</b>                  |
|                                               | 18              | 598           | 1136   | 1647        | <b>&lt;0.001</b>                  | 544           | 813    | 1341        | <b>&lt;0.001</b>                  |
|                                               | 19              | 525           | 992    | 1441        | <b>&lt;0.001</b>                  | 512           | 776    | 1136        | <b>&lt;0.001</b>                  |
|                                               | 20              | 351           | 603    | 997         | <b>&lt;0.001</b>                  | 335           | 498    | 768         | <b>&lt;0.001</b>                  |
|                                               | 21              | 221           | 359    | 586         | <b>&lt;0.001</b>                  | 235           | 339    | 509         | <b>&lt;0.001</b>                  |
|                                               | 22              | 183           | 234    | 319         | <b>&lt;0.001</b>                  | 220           | 269    | 372         | <b>&lt;0.001</b>                  |
|                                               | 23              | 103           | 234    | 281         | <b>0.010</b>                      | 143           | 213    | 280         | <b>0.007</b>                      |
| step count on<br>weekends<br>(hourly avarage) | 7               | 119           | 164    | 545         | <b>0.005</b>                      | 80            | 258    | 300         | <b>0.008</b>                      |
|                                               | 8               | 264           | 398    | 805         | <b>&lt;0.001</b>                  | 287           | 444    | 508         | <b>&lt;0.001</b>                  |
|                                               | 9               | 356           | 590    | 1090        | <b>&lt;0.001</b>                  | 377           | 461    | 822         | <b>&lt;0.001</b>                  |
|                                               | 10              | 454           | 684    | 1277        | <b>&lt;0.001</b>                  | 426           | 663    | 959         | <b>&lt;0.001</b>                  |
|                                               | 11              | 527           | 784    | 1247        | <b>&lt;0.001</b>                  | 506           | 619    | 1034        | <b>&lt;0.001</b>                  |
|                                               | 12              | 499           | 812    | 1145        | <b>&lt;0.001</b>                  | 439           | 614    | 1034        | <b>&lt;0.001</b>                  |
|                                               | 13              | 501           | 730    | 1170        | <b>&lt;0.001</b>                  | 451           | 610    | 966         | <b>&lt;0.001</b>                  |

|    |     |     |      |                  |     |     |     |                  |
|----|-----|-----|------|------------------|-----|-----|-----|------------------|
| 14 | 524 | 824 | 1233 | <b>&lt;0.001</b> | 448 | 616 | 958 | <b>&lt;0.001</b> |
| 15 | 458 | 860 | 1192 | <b>&lt;0.001</b> | 438 | 638 | 972 | <b>&lt;0.001</b> |
| 16 | 479 | 802 | 1203 | <b>&lt;0.001</b> | 431 | 622 | 902 | <b>&lt;0.001</b> |
| 17 | 457 | 731 | 1147 | <b>&lt;0.001</b> | 422 | 609 | 876 | <b>&lt;0.001</b> |
| 18 | 507 | 753 | 1167 | <b>&lt;0.001</b> | 424 | 594 | 914 | <b>&lt;0.001</b> |
| 19 | 432 | 691 | 1033 | <b>&lt;0.001</b> | 385 | 608 | 832 | <b>&lt;0.001</b> |
| 20 | 316 | 463 | 728  | <b>&lt;0.001</b> | 366 | 422 | 602 | <b>&lt;0.001</b> |
| 21 | 219 | 281 | 351  | <b>0.004</b>     | 199 | 370 | 450 | <b>&lt;0.001</b> |
| 22 | 137 | 231 | 322  | <b>&lt;0.001</b> | 143 | 236 | 316 | <b>&lt;0.001</b> |
| 23 | 158 | 227 | 212  | <b>0.041</b>     | 72  | 288 | 253 | <b>&lt;0.001</b> |
