# Supplementary material for: Accelerometer-Measured Physical Activity Levels and Patterns Vary in an Age- and Sex-Dependent Fashion among Finnish Children and Adolescents
Source: MDPI journal article supplement (doi:10.3390/ijerph19116950), 2022-06-06
Supplement: s1 [file s1]

Figure S1. Relationship between oxygen consumption and mean amplitude deviation for adults and children

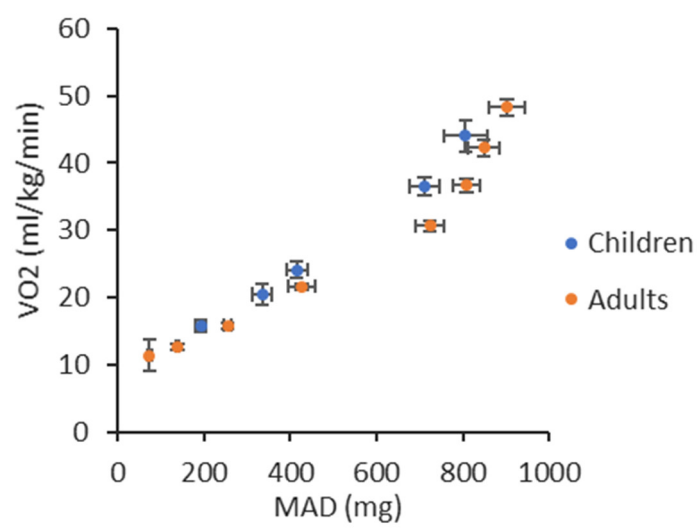

\*The error bars represent the 95 % confidence intervals.
