# Supplementary material for: Accelerometer-Measured Physical Activity Levels and Patterns Vary in an Age- and Sex-Dependent Fashion among Finnish Children and Adolescents
Source: Int J Environ Res Public Health. 2022 Jun 6;19(11):6950. doi: 10.3390/ijerph19116950 (PMC9180141; doi:10.3390/ijerph19116950)
Supplement: Supplementary file 1 [file ijerph-19-06950-s001.zip]

Archive with 4 entries (4 files):
- FigS1. Relationship between oxygen consumption and mean amplitude deviation for adults and children.pdf
- TabS1. Participants hourly step counts by sex and tertiles and p-values for tertile differences.pdf
- TabS2. Participants hourly LPA minutes by sex and tertiles and p-values for tertile differences.pdf
- TabS3. Participants hourly MET values by sex and tertiles and p-values for tertile differences.pdf
